# Supplementary material for: The Emerging Physiological Role of AGMO 10 Years after Its Gene Identification
Source: PubMed Central journal article supplement (PMC7911779; doi:10.3390/life11020088), 2021-01-26
Supplement: life-11-00088-s001.pdf [file life-11-00088-s001.pdf]

**Table S1.** AGMO variants implicated in human diseases including the chromosomal position and the corresponding reference.

| Variant     | Mutation               | Chromosomal Location (Start) | Mapped Gene(s)      | Reference  |
|-------------|------------------------|------------------------------|---------------------|------------|
| rs2191349   | G>C / G>T              | 7:15024684                   | AGMO, DGKB          | [40,41,43] |
| rs10479944  | T>A / T>G              | 7:15074211                   | AGMO,<br>AC006458.1 | [58]       |
| rs12699683  | G>T                    | 7:15093502                   | AGMO,<br>AC006458.1 | [70]       |
| rs115030349 | T>C                    | 7:15148284                   | AGMO,<br>AC006458.1 | [71]       |
|             | del ex2-8/13           | 7:15160118                   | AGMO                | [74-75]    |
| rs2908334   | C>G / C>T              | 7:15166614                   | AGMO,<br>AC006458.1 | [55]       |
| rs7783100   | T>A / T>C /<br>T>G     | 7:15187015                   | AGMO,<br>AC006458.1 | [65]       |
| rs12531478  | G>A                    | 7:15200269                   | AGMO,<br>AC006458.1 | [54]       |
| rs7777171   | C>A / C>T              | 7:15201812                   | AGMO                | [60]       |
| rs6952254   | T>A / T>C              | 7:15235692                   | AGMO                | [68]       |
| rs10232074  | C>G                    | 7:15260750                   | AGMO                | [62]       |
| rs12531027  | T>C                    | 7:15296311                   | AGMO                | [51]       |
| rs10279259  | T>C                    | 7:15314104                   | AGMO                | [68]       |
| rs9648203   | G>A / G>C /<br>G>T     | 7:15316654                   | AGMO                | [68]       |
| rs73064535  | T>C                    | 7:15339805                   | AGMO                | [69]       |
| rs12699708  | G>A / G>T              | 7:15363341                   | AGMO                | [68]       |
| rs139309795 | G>A                    | 7:15365564                   | AGMO                | [83]       |
| rs60424486  | dupTTTGA-<br>GAGGTGCCT | 7:15370687                   | AGMO                | [61]       |
| rs368430933 | G>A / G>C              | 7:15385575                   | AGMO                | [81]       |
| rs143439626 | T>C                    | 7:15390881                   | AGMO                | [83]       |
| rs73284431  | G>C                    | 7:15394605                   | AGMO                | [53]       |
| rs6960653   | T>C / T>G              | 7:15395008                   | AGMO                | [68]       |
| rs183966018 | C>T                    | 7:15418914                   | AGMO                | [64]       |
| rs11765688  | A>G                    | 7:15428574                   | AGMO                | [68]       |
| rs7781293   | C>A / C>G /<br>C>T     | 7:15451358                   | AGMO                | [50]       |
| rs4628172   | T>G                    | 7:15455525                   | AGMO                | [50]       |
| rs4721442   | T>G                    | 7:15466382                   | AGMO                | [57]       |
| rs73290427  | G>C / G>T              | 7:15466485                   | AGMO                | [62]       |
| rs55905169  | G>A / G>C              | 7:15466904                   | AGMO                | [59]       |
| rs7789097   | C>A / C>T              | 7:15468511                   | AGMO                | [63]       |
| rs6461187   | C>A / C>G              | 7:15481733                   | AGMO                | [58]       |
| rs202094268 | A>G                    | 7:15544884                   | AGMO                | [81]       |
|             | del ex1-3/13           | 7:15549000                   | TMEM195/AGMO        | [85]       |

|             |                    |                              |             |      |
|-------------|--------------------|------------------------------|-------------|------|
| rs916943    | C>T                | 7:15554143                   | AGMO        | [56] |
|             | G>A                | 7:15560278 and               | AGMO        | [82] |
|             | G>T                | 7:15560266                   |             |      |
|             | G>A<br>delTAT      | 7:15560292 and<br>7:15560264 | AGMO        | [82] |
| rs10239845  | A>G                | 7:15566713                   | AGMO, MEOX2 | [68] |
| rs6951635   | T>C                | 7:15571071                   | AGMO, MEOX2 | [72] |
| rs6951635   | T>C                | 7:15571071                   | AGMO, MEOX2 | [73] |
| rs11763353  | A>G                | 7:15591246                   | AGMO, MEOX2 | [67] |
| rs397948882 | dupA               | 7:15597254                   | AGMO, MEOX2 | [64] |
| rs1859270   | T>A / T>C /<br>T>G | 7:15604673                   | AGMO, MEOX2 | [52] |
| rs12699747  | T>A / T>C /<br>T>G | 7:15610603                   | AGMO, MEOX2 | [66] |
